# Supplementary material for: Targeting Virulence Genes Expression in Vibrio vulnificus by Alternative Carbon Sources
Source: MDPI journal article supplement (doi:10.3390/ijms232315278), 2022-12-03
Supplement: s1 [file s1]

**Table S1: RT-qPCR Primers. Gene name, primer pairs and corresponding GeneBank accession number of the selected genes used. All the primers were designed in this study.**

| <b>Gene name</b> | <b>Primer pairs sequence</b>                           | <b>Accession number</b> |
|------------------|--------------------------------------------------------|-------------------------|
| <i>hlyU</i>      | GGTCGGGGAAC TTTGTGC<br>CCGTTTGTGCTTCTTTACGC            | DI002108.1              |
| <i>vvhA</i>      | CGTGACCTACCGCAGAATG<br>GACTTCGCCACCCACTTTC             | KC821520.1              |
| <i>vvpE</i>      | GCTCTGCGATGACATTTGG<br>GCCTCCCGACATATTGCTG             | FJ864304.1              |
| <i>rtxA</i>      | ATCCAGAAACGGGCAAACTC<br>TCAAACACCACGAGCAGAAGAG         | FJ002581.2              |
| <i>plpA</i>      | CTGATGACCTTGCCTGATGCTAC<br>CGCTTGTGCTTTGATGAACTC       | CP002470.1              |
| <i>aphB</i>      | CACCCGACGCATACAAGC<br>TGACGCACCACGACATTC               | CP014636.1              |
| <i>smcR</i>      | TGGCGACCGTCTTCAACTAC<br>TGGCGATGTTTTCTTTAGCG           | AF204737.1              |
| <i>lrp</i>       | CGTAAATTGCTCGGTGATACTCTG<br>GGTTGGTTTGCTTCACTTCTTCC    | AY160773.1              |
| <i>hupA</i>      | TTAACTCCTGGCGTTCGTTAC<br>TCTTGCGTTACCTTGTAAGTGG        | KC741523.1              |
| <i>VVA1308</i>   | CTGGTTTTTGGCTGTAGATGG<br>CTTAGACGCTCTGGATTATCTTGG      | CP044068.1              |
| <i>VvdRP</i>     | AGGATGAGTCCGTTTATCGCC<br>GCAGATGCTAAACCTTTCATAACTATCAC | CP012881.1              |
| <i>vvuA</i>      | TGTTTGGTGCTCGCTCTAGTTC<br>CTAACGGTGATGTGCTTATCGC       | BA000038.2              |
| <i>gyrB</i>      | GATGCGCGTGAAGGTTTG<br>CTGCCATGAAGGATTCCAC              | GQ382205.1              |
| <i>recA</i>      | GCCGCATTGACACCAAAG<br>TCACGCCGATCTTCATACG              | GQ382239.1              |
